# Supplementary material for: A co-infection case report of Taenia saginata in a patient with subclinical clonorchiasis confirmed by the combination of diagnostic tools
Source: BMC Infect Dis. 2019 Feb 6;19:115. doi: 10.1186/s12879-019-3758-0 (PMC6364428; doi:10.1186/s12879-019-3758-0)
Supplement: Supplementary file 1 — Polymorphic sites of cox1 and ef1a sequences of the submitted proglottids compared with those of human Taenia tapeworms. Numbers indicate the positions from 5′end of the cox1 or ef1a gene, and dots indicate sequence matches with T. saginata. *Three sites (nucleotide 294, 336, 405) were distinguishable substitiutions in all of three human Taenia tapeworms. (XLSX 16 kb) [file 12879_2019_3758_MOESM1_ESM.xlsx]

## Sheet: T1
Additional file 1. Polymorphic sites of cox1 and ef1a sequences of the submitted proglottids compared with those of human Taenia tapeworms
	Nucleotide position of cox1 gene of Taenia species
	51	58	60	72	105	138	153	174	189	195	219	225	231	234	237	243	246	252	261	265	267	268	270	273	279	285	288	291	294*	300	315	321	324	325	330	333	336*	338	348	349	354	363	366	381	390	393	399	402	405*
Taenia saginata (AB465246.1)	G	A	G	G	A	G	G	T	T	A	A	T	A	A	T	C	C	T	T	G	T	G	T	G	T	G	T	A	C	A	A	A	G	A	T	G	G	C	G	G	T	G	T	G	T	G	G	G	A
Subject (in this study)	.	.	.	.	.	.	.	.	.	.	.	.	.	.	.	.	.	.	.	.	.	.	.	.	.	.	.	.	.	.	.	.	.	.	.	.	.	.	.	.	.	.	.	.	.	.	.	.	.
Taenia asiatica (AB465224.1)	.	G	.	A	.	.	T	.	C	.	G	C	G	.	.	T	T	.	.	.	.	.	.	.	.	A	C	G	T	.	G	G	.	.	.	A	A	T	A	.	.	.	.	A	.	.	.	.	G
Taenia solium (NC_004022)	A	.	A	.	T	A	.	A	C	T	.	.	.	T	A	T	T	C	A	A	A	A	A	A	G	.	.	.	A	G	.	G	A	G	A	A	T	T	A	A	G	A	C	.	C	A	A	A	T
	Nucleotide position of ef1a gene of Taenia species
	15	33	36	48	54	72	84	87	93	96	141	147	150	156	183	198	207	303	333	381	392	405	408	423	447	477	522	528	564	576	586	612	624	636	639	645	651	657	661	675	702	738	747	807	810	816	819	837	845
Taenia saginata (AB533182.1)	C	C	C	G	A	C	A	C	G	C	T	C	C	A	A	G	T	C	T	T	Blank	G	A	T	C	C	A	A	C	Blank	T	C	T	G	T	T	C	T	G	A	A	C	A	T	A	C	C	C	Blank
Subject (in this study)										.	.	.	.	.	.	.	.	.	.	.	T	.	.	.	.	.	.	.	.	Blank	.	.	.	.	.	.	.	.	.	.	.	.	.	.	.	.	.	.	A
Taenia asiatica (FN568388)	.	.	.	A	.	.	.	.	.	.	.	T	T	G	.	.	C	.	C	.	T	.	.	.	.	.	.	G	T	T	.	.	.	.	.	.	.	.	.	.	.	.	.	.	.	.	.	.	A
Taenia solium (FN568386)	T	T	T	.	G	T	G	T	A	T	C	T	T	G	G	A	.	T	.	C	T	A	T	C	T	A	G	G	.	T	C	T	C	C	C	C	T	C	A	T	C	T	G	C	G	T	T	A	A
Numbers indicate the positions from 5′end of the cox1 or ef1a gene, and dots indicate sequence matches with T. saginata.
*Three sites (nucleotide 294, 336, 405) were distinguishable substitiutions in all of three human Taenia tapeworms.
[truncated: 24 more columns]
